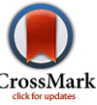

## Correction

# Correction: Cardiac Impairment Evaluated by Transesophageal Echocardiography and Invasive Measurements in Rats Undergoing Sinoaortic Denervation

**The PLOS ONE Staff**

The following information is missing from the Funding section:  
This study was supported by CNPq grant 485757/2007-9.

**Reference**

1. Sirvente RA, Irigoyen MC, Souza LE, Mostarda C, La Fuente RN, et al. (2014) Cardiac Impairment Evaluated by Transesophageal Echocardiography and Invasive Measurements in Rats Undergoing Sinoaortic Denervation. PLoS ONE 9(5): e87935. doi:10.1371/journal.pone.0087935

---

**Citation:** The PLOS ONE Staff (2014) Correction: Cardiac Impairment Evaluated by Transesophageal Echocardiography and Invasive Measurements in Rats Undergoing Sinoaortic Denervation. PLoS ONE 9(8): e105744. doi:10.1371/journal.pone.0105744

**Published:** August 7, 2014

**Copyright:** © 2014 The PLOS ONE Staff. This is an open-access article distributed under the terms of the Creative Commons Attribution License, which permits unrestricted use, distribution, and reproduction in any medium, provided the original author and source are credited.
